# Supplementary material
Source: Springer Nature journal article supplement (https://www.springermedizin.de/resource/supplementary/11689_2012_35_MOESM4_ESM.pdf/9673158)

# FACES

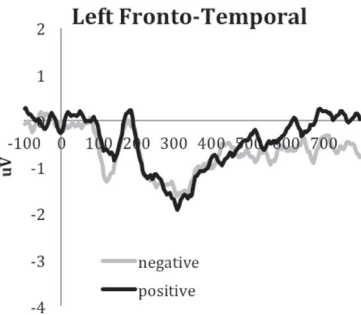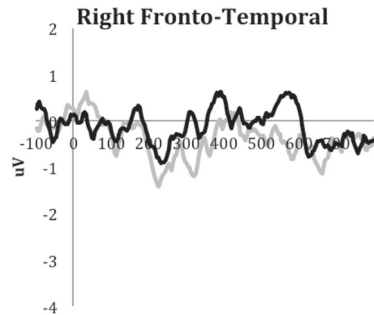

# INVERTED FACES

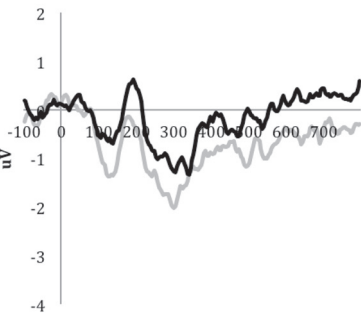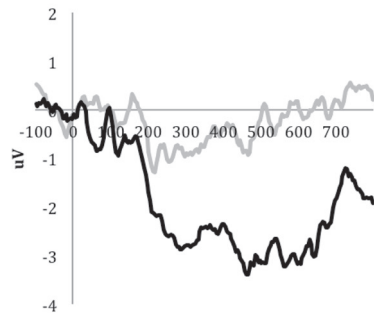

# OBJECTS

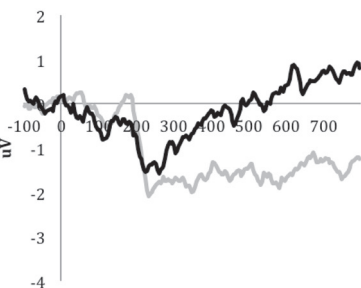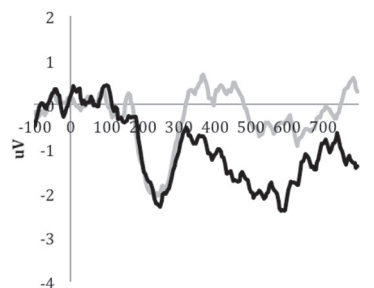

Supplement: MOESM4 [file 9673158]
